# Supplementary material
Source: PubMed Central journal article supplement (PMC5215050)
Supplement: NIHMS70895-supplement-Supplementary_Figure_1.pdf [file NIHMS70895-supplement-Supplementary_Figure_1.pdf]

## Supplementary Figure 1: MS/MS analysis of isolated *B. fragilis* proteins

Mass spectrometric analyses were performed on an AmaZon ETD ion trap (Bruker Daltoniks, Bremen, Germany) coupled to an Ultimate 3000 UHPLC system (Dionex). The instrument was set up to perform both, CID and ETD fragmentation on the selected precursors. An  $m/z$  range from 400-1500 Da was used for data dependant precursor scanning. The three most intense signals in every MS scan were selected for MS/MS experiments, and just signals with a charge state  $\geq 2+$  were selected for MS/MS. The data was recorded in the "enhanced resolution mode". Tryptic peptides were separated by reversed phase chromatography (ProteCol™ Capillary Column, SGE, Ringwood, Vic, Australia, 300  $\mu\text{m}$  x 10 mm [precolumn] and 300  $\mu\text{m}$  x 150 mm [analytical column]). The samples were loaded onto the precolumn in 100% solvent A (0.1% Formic acid) and unbound components were eluted by washing the precolumn for 5 min in buffer A. The starting conditions for the analytical column were 2% solvent B (acetonitrile with 0.1% Formic acid). After desalting the sample on the precolumn, a gradient using an increasing solvent B concentration was applied. The gradient conditions were as follows: linear increase of buffer B from 2 to 30% (from 5 min to 61 min), further increase to 60% (61 to 76 min), followed by a steep increase to 90% (76 to 77 min). The column was held at 90% B for 5 min (77 to 82 min) before reequilibrating the analytical column in 2% solvent B. Meanwhile the precolumn was reequilibrated in 100% solvent A before injection of the next sample.

## Accumulated Protein Report

### Project Info

Name: David Leitsch Date: November 28, 2011

### Sample Info & Protocols

Date: August 13, 2013

Name: Bacteroides\_II

**Search Type** Combined MS/MS - ProteinExtractor  
**Search Result** Bacteroides\_NIM\_2013-08-13 15:37:01  
**Search Location** /David Leitsch\_Tricho/Bacteroides\_II/

**Search Type** Combined MS/MS - ProteinExtractor  
**Search Result** Amazon Bacteria\_NCBI\_2013-08-13 13:47:48  
**Search Location** /David Leitsch\_Tricho/Bacteroides\_II/DL\_NimA\_RC6\_01\_560.d/

**Protein 1:** nimA [Bacteroides vulgatus]

**Accession:** gj|435265 **Score:** 461.86

**Database:** NCBIInr **MW [kDa]:** 20.20

**Seq. Coverage [%]:** 35.20 % **pI:** 7.83

**No. of Peptides:** 7

**Modification(s):** Carbamidomethyl, Oxidation

|            |            |            |            |            |            |            |            |            |            |            |            |
|------------|------------|------------|------------|------------|------------|------------|------------|------------|------------|------------|------------|
| 10         | 20         | 30         | 40         | 50         | 60         | 70         | 80         | 90         | 100        | 110        | 120        |
| MFREMRKRQ  | LLPPEESLAI | LERMTGGTIA | LHGDNGYPYA | VPVSYVYADG | KIYFHGAVQG | HKMDAIRQHP | EVSFCVVEQD | RIVPAEFTTY | FRSVIVFGKA | RILTDEVEKR | AALLRLAEKY |
| 130        | 140        | 150        | 160        | 170        | 180        |            |            |            |            |            |            |
| SSGESGMQDE | IDKGFHLVM  | VEITVEHMTG | KEAIQLVRRK | GNNRWDAFPS | KDVFIR     |            |            |            |            |            |            |

| Cmpd. | No. of Cmpds. | m/z meas. | $\Delta$ m/z [ppm] | z | Rt [min] | Score | P | Range | Sequence           | Modification       |
|-------|---------------|-----------|--------------------|---|----------|-------|---|-------|--------------------|--------------------|
| 250   | 3             | 804.4150  | -48.22             | 2 | 42.9     | 55.7  | 0 | 10-23 | R.QLLPEESLAILER.M  |                    |
| 116   | 2             | 865.3480  | -62.12             | 2 | 31.0     | 60.0  | 0 | 68-81 | R.QHPEVSFCVVEQDR.I | Carbamidomethyl: 8 |
| 354   | 4             | 672.2940  | -88.27             | 2 | 54.3     | 62.8  | 0 | 82-92 | R.IVPAEFTTYFR.S    |                    |

# Accumulated Protein Report

| Cmpd. | No. of Cmpds. | m/z meas. | $\Delta$ m/z [ppm] | z | Rt [min] | Score | P | Range   | Sequence           | Modification |
|-------|---------------|-----------|--------------------|---|----------|-------|---|---------|--------------------|--------------|
| 52    | 2             | 473.7070  | -108.10            | 2 | 24.4     | 40.5  | 0 | 102-109 | R.ILTDEVEK.R       |              |
| 91    | 4             | 551.7580  | -92.01             | 2 | 28.1     | 77.1  | 1 | 102-110 | R.ILTDEVEKR.A      |              |
| 56    | 1             | 773.2730  | -63.76             | 2 | 24.9     | 50.2  | 0 | 120-133 | K.YSSGESGMQDEIDK.G |              |
| 8     | 1             | 781.2970  | -29.14             | 2 | 19.9     | 66.3  | 0 | 120-133 | K.YSSGESGMQDEIDK.G | Oxidation: 8 |

**Search Type** Combined MS/MS - ProteinExtractor  
**Search Result** Amazon Bacteria\_NCBI\_2013-08-13 15:07:52  
**Search Location** /David Leitsch\_Tricho/Bacteroides\_II/DL\_NimD\_RC7\_01\_562.d/  
**Protein 1:** nimD [Bacteroides fragilis]  
**Accession:** gi|440387 **Score:** 312.49  
**Database:** NCBIInr **MW [kDa]:** 18.50  
**Seq. Coverage [%]:** 28.00 % **pI:** 5.54  
**Modification(s):** Oxidation, Deamidated **No. of Peptides:** 5

|                    |                    |                            |            |            |            |            |            |            |            |                   |                   |
|--------------------|--------------------|----------------------------|------------|------------|------------|------------|------------|------------|------------|-------------------|-------------------|
| 10                 | 20                 | 30                         | 40         | 50         | 60         | 70         | 80         | 90         | 100        | 110               | 120               |
| MFREMPRK <b>RQ</b> | <b>LLPTEESVAI</b>  | <b>LERMT</b> <b>NGT</b> LA | LHGDDGYPYA | VPVSYVYADG | KIYFHSAMQG | PKVDAILRND | KVSFCVVEQD | EVKPAEFTTY | FRSVIVFGKA | <b>RILTDENEKR</b> | <b>NALNLLADKY</b> |
| 130                | 140                | 150                        | 160        | 170        |            |            |            |            |            |                   |                   |
| <b>SHGEAGMEAE</b>  | <b>MAK</b> GFNHLLM | IEITVEQMTG                 | KEAIELTRGR | NGCS       |            |            |            |            |            |                   |                   |

| Cmpd. | No. of Cmpds. | m/z meas. | $\Delta$ m/z [ppm] | z | Rt [min] | Score | P | Range   | Sequence                    | Modification  |
|-------|---------------|-----------|--------------------|---|----------|-------|---|---------|-----------------------------|---------------|
| 254   | 1             | 799.4130  | -38.05             | 2 | 39.5     | 36.6  | 0 | 10-23   | R.QLLPTEESVAILER.M          |               |
| 11    | 1             | 559.2820  | -25.08             | 2 | 18.3     | 68.0  | 1 | 102-110 | R.ILTDENEKR.N               |               |
| 16    | 1             | 559.7740  | -25.07             | 2 | 19.0     | 89.5  | 1 | 102-110 | R.ILTDENEKR.N               | Deamidated: 6 |
| 229   | 10            | 486.7550  | 977.53             | 2 | 37.3     | 54.7  | 0 | 111-119 | R.NALNLLADK.Y               |               |
| 61    | 1             | 504.2060  | -17.61             | 3 | 22.9     | 28.8  | 0 | 120-133 | K.YSHGEAGMEAE <b>MAK</b> .G |               |

## Accumulated Protein Report

**Search Type** Combined MS/MS - ProteinExtractor  
**Search Result** Amazon Bacteria\_NCBI\_2013-08-13 13:05:55  
**Search Location** /David Leitsch\_Tricho/Bacteroides\_II/NimE2\_aus\_BA8\_01\_2798.d/  
**Protein 1:** NimE nitroimidazole reductase [Bacteroides fragilis]  
**Accession:** gi|70559779 **Score:** 397.35  
**Database:** NCBIInr **MW [kDa]:** 16.60  
**Seq. Coverage [%]:** 39.30 % **pI:** 8.88  
**No. of Peptides:** 6  
**Modification(s):** Oxidation, Deamidated

|            |            |           |            |            |            |            |            |            |            |            |            |
|------------|------------|-----------|------------|------------|------------|------------|------------|------------|------------|------------|------------|
| 10         | 20         | 30        | 40         | 50         | 60         | 70         | 80         | 90         | 100        | 110        | 120        |
| MFREMRKRQ  | LLPQEEVAI  | LEKMTNGLA | LHGDNGYPYA | VPLSYFYADG | KIYFHCAKIG | HKVDAIMQNN | KVSFCVVEQD | NIKPAEFTTY | FRSVIVFGKA | YILTDETEKR | MAMTLLVNKY |
| 130        | 140        | 150       |            |            |            |            |            |            |            |            |            |
| SFGEPGLSDE | IAKSINHLIM | VKIDI     |            |            |            |            |            |            |            |            |            |

| Cmpd. | No. of Cmpds. | m/z meas. | $\Delta$ m/z [ppm] | z | Rt [min] | Score | P | Range   | Sequence           | Modification                |
|-------|---------------|-----------|--------------------|---|----------|-------|---|---------|--------------------|-----------------------------|
| 125   | 1             | 799.0290  | 104.14             | 2 | 39.1     | 69.1  | 0 | 10-23   | R.QLLPQEEVAILEK.M  |                             |
| 1     | 2             | 525.3440  | 178.52             | 2 | 14.6     | 57.1  | 0 | 63-71   | K.VDAIMQNNK.V      | Oxidation: 5; Deamidated: 7 |
| 61    | 3             | 591.8350  | 62.41              | 2 | 26.1     | 65.3  | 0 | 100-109 | K.AYILTDETEK.R     |                             |
| 77    | 7             | 446.9460  | 99.56              | 3 | 29.0     | 67.8  | 1 | 100-110 | K.AYILTDETEK.R.M   |                             |
| 48    | 3             | 526.8300  | 99.53              | 2 | 23.6     | 61.3  | 0 | 111-119 | R.MAMTLLVNK.Y      | Oxidation: 1, 3             |
| 108   | 3             | 756.9460  | 107.72             | 2 | 35.0     | 76.8  | 0 | 120-133 | K.YSFGEPGLSDEIAK.S |                             |

**Search Type** Combined MS/MS - ProteinExtractor  
**Search Result** Amazon Bacteria\_NCBI\_2013-08-13 13:09:38  
**Search Location** /David Leitsch\_Tricho/Bacteroides\_II/nimB2\_aus\_BA3\_01\_2792.d/

## Accumulated Protein Report

**Protein 1:** nimB [Bacteroides fragilis]  
**Accession:** gj|435261  
**Database:** NCBIInr  
**Seq. Coverage [%]:** 56.10 %

**Score:** 579.72  
**MW [kDa]:** 18.60  
**pI:** 6.35  
**No. of Peptides:** 10

**Modification(s):** Oxidation

|            |            |            |            |            |            |            |            |            |            |            |            |
|------------|------------|------------|------------|------------|------------|------------|------------|------------|------------|------------|------------|
| 10         | 20         | 30         | 40         | 50         | 60         | 70         | 80         | 90         | 100        | 110        | 120        |
| MFREMRKRQ  | LLPTEESVAI | LERMTNGTLA | LHGDDGYPIA | VPISYVYADG | KIYFHSAMKG | HKVDAILQND | KVSFCVVEQD | DIRPSEFTTY | FRSVIVFGKA | HILTDELEKR | VALGLLADKY |
| 130        | 140        | 150        | 160        | 170        |            |            |            |            |            |            |            |
| SYGEAGMEAE | IARGFNHLI  | VKIAIEHITG | KEAIELTKNR | NDRP       |            |            |            |            |            |            |            |

| Cmpd. | No. of Cmpds. | m/z meas. | $\Delta$ m/z [ppm] | z | Rt [min] | Score | P | Range   | Sequence           | Modification |
|-------|---------------|-----------|--------------------|---|----------|-------|---|---------|--------------------|--------------|
| 228   | 1             | 799.5420  | 123.31             | 2 | 42.0     | 28.7  | 0 | 10-23   | R.QLLPTEESVAILER.M |              |
| 89    | 2             | 506.8480  | 194.04             | 2 | 24.9     | 32.4  | 0 | 52-59   | K.IYFHSAMK.G       | Oxidation: 7 |
| 142   | 4             | 446.6230  | 102.45             | 3 | 31.1     | 46.0  | 1 | 60-71   | K.GHKVDAILQNDK.V   |              |
| 61    | 3             | 508.3240  | 97.26              | 2 | 21.6     | 73.8  | 0 | 63-71   | K.VDAILQNDK.V      |              |
| 144   | 3             | 584.8810  | 114.48             | 2 | 31.3     | 64.5  | 0 | 100-109 | K.AHILTDELEK.R     |              |
| 174   | 3             | 450.3350  | 118.46             | 2 | 34.6     | 75.8  | 0 | 111-119 | R.VALGLLADK.Y      |              |
| 86    | 3             | 767.9030  | 81.87              | 2 | 24.5     | 95.5  | 0 | 120-133 | K.YSYGEAGMEAEIAK.G | Oxidation: 8 |
| 199   | 5             | 520.9040  | 168.58             | 2 | 37.2     | 54.8  | 0 | 134-142 | K.GFNHLLIVK.I      |              |
| 120   | 7             | 491.3560  | 134.31             | 2 | 28.4     | 72.5  | 0 | 143-151 | K.IAIEHITGK.E      |              |
| 62    | 2             | 402.2790  | 124.07             | 2 | 21.8     | 35.8  | 0 | 152-158 | K.EAIELTK.N        |              |

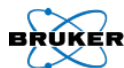

# Detailed Protein Report

## Project Info

Name: David Leitsch\_Tricho Date: November 28, 2011

## Sample Info & Protocols

Name: Bacteroides Date: November 15, 2012

## Search Result Info

| Search Result                        | Location                                  | Search Engine  | Database                                         | Ident. Compounds |
|--------------------------------------|-------------------------------------------|----------------|--------------------------------------------------|------------------|
| Amazon BFrugilis_2012-11-15 18:57:50 | /David Leitsch_Tricho/Bacteroides/BF2.mgf | Mascot, 2.3.02 | BacteroidesFragilis, uniprotorganismbfragilis.fe | 24/290           |

**Protein 1:** Putative oxidoreductase OS=Bacteroides fragilis (strain 638R) GN=BF638R\_3505 PE=4 SV=1

**Accession:** E1WVQ6\_BACF6 **Score:** 549.06

**Database:** BacteroidesFragilis **MW [kDa]:** 32.30

**Seq. Coverage [%]:** 63.90 % **pl:** 6.20

**No. of Peptides:** 15

**Modification(s):** Carbamidomethyl, Oxidation, Deamidated

|             |            |            |            |            |            |            |            |            |            |            |            |
|-------------|------------|------------|------------|------------|------------|------------|------------|------------|------------|------------|------------|
| 10          | 20         | 30         | 40         | 50         | 60         | 70         | 80         | 90         | 100        | 110        | 120        |
| MKKVRAAIVG  | YGNIGRYVLE | ALQAASDFEI | AGVVRAGAE  | NKPAELNDYA | VVKDIKELQG | VDVAILCTPT | RSVEKYAKEI | LAMGINTVDS | FDIHTGIVDL | RRELGACAKE | HGAVSIISAG |
| 130         | 140        | 150        | 160        | 170        | 180        | 190        | 200        | 210        | 220        | 230        | 240        |
| WDPGSDSIVR  | TMLEAIAPKG | ITYTNFGPGM | SMGHTVAVKA | IDGVKAALSM | TIPTGTGIHR | RMVYIELKDG | YKFEEVAAAI | KSDAYFVNDE | THVKQVPSVD | ALLDMGHGVN | LTRKGVSGKT |
| 250         | 260        | 270        | 280        | 290        | 300        |            |            |            |            |            |            |
| QNQLFEFNMNR | INNPAITAQV | LVCVAR     | ASMK       | QQPGCYTMVE | VPVIDLLPGD | REEWIGHLV  |            |            |            |            |            |

| Cmpd. | No. of Cmpds. | m/z meas. | $\Delta$ m/z [ppm] | z | Rt [min] | Score | P | Range | Sequence               | Modification |
|-------|---------------|-----------|--------------------|---|----------|-------|---|-------|------------------------|--------------|
| 50    | 1             | 648.9930  | -25.33             | 3 | 26.2     | 25.8  | 1 | 36-53 | R.RAGAENKPAELNDYAVVK.D |              |

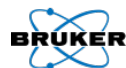

# Detailed Protein Report

| Cmpd. | No. of Cmpds. | m/z meas. | $\Delta$ m/z [ppm] | z | Rt [min] | Score | P | Range   | Sequence               | Modification                       |
|-------|---------------|-----------|--------------------|---|----------|-------|---|---------|------------------------|------------------------------------|
| 106   | 3             | 495.2430  | -55.40             | 2 | 31.2     | 44.1  | 0 | 131-139 | R.TMLEAIAPK.G          | Oxidation: 2                       |
| 124   | 1             | 509.2560  | -40.63             | 3 | 32.9     | 29.5  | 0 | 166-180 | K.AALSMTIPTGTGIHR.R    |                                    |
| 76    | 2             | 514.5670  | -80.31             | 3 | 28.5     | 40.3  | 0 | 166-180 | K.AALSMTIPTGTGIHR.R    | Oxidation: 5                       |
| 146   | 1             | 720.8220  | -69.50             | 2 | 35.2     | 28.8  | 1 | 189-201 | K.DGYKFEEVAAAIK.S      |                                    |
| 55    | 1             | 508.8660  | -74.06             | 3 | 26.8     | 25.5  | 0 | 202-214 | K.SDAYFVNDETHVK.Q      |                                    |
| 216   | 1             | 1012.0230 | 491.85             | 2 | 42.0     | 28.9  | 0 | 215-233 | K.QVPSVDALLDMGHGVNLR.K |                                    |
| 216   | 1             | 1012.0230 | 5.45               | 2 | 42.0     | 28.9  | 0 | 215-233 | K.QVPSVDALLDMGHGVNLR.K | Deamidated: 1                      |
| 195   | 2             | 680.3340  | -17.23             | 3 | 39.8     | 63.1  | 0 | 215-233 | K.QVPSVDALLDMGHGVNLR.K | Oxidation: 11; Deamidated: 1       |
| 195   | 2             | 680.3340  | 465.11             | 3 | 39.8     | 63.6  | 0 | 215-233 | K.QVPSVDALLDMGHGVNLR.K | Oxidation: 11                      |
| 172   | 1             | 714.3060  | -48.22             | 2 | 37.5     | 22.1  | 0 | 240-250 | K.TQNQLFEFNMR.I        |                                    |
| 130   | 2             | 722.2900  | -66.31             | 2 | 33.7     | 27.1  | 0 | 240-250 | K.TQNQLFEFNMR.I        | Oxidation: 10                      |
| 200   | 1             | 870.4530  | 537.64             | 2 | 40.2     | 89.0  | 0 | 251-266 | R.INNPALTAQVLVCVAR.A   | Carbamidomethyl: 13                |
| 200   | 1             | 870.4530  | -27.88             | 2 | 40.2     | 89.0  | 0 | 251-266 | R.INNPALTAQVLVCVAR.A   | Carbamidomethyl: 13; Deamidated: 3 |
| 200   | 1             | 870.4530  | -27.88             | 2 | 40.2     | 89.0  | 0 | 251-266 | R.INNPALTAQVLVCVAR.A   | Carbamidomethyl: 13; Deamidated: 2 |

**Protein 2:** Putative D-3-phosphoglycerate dehydrogenase OS=Bacteroides fragilis (strain 638R) GN=serA PE=3 SV=1

**Accession:** E1WWI4\_BACF6 **Score:** 241.25

**Database:** BacteroidesFragilis **MW [kDa]:** 33.10

**Seq. Coverage [%]:** 40.20 % **pI:** 6.17

**No. of Peptides:** 6

**Modification(s):** Carbamidomethyl, Oxidation, Deamidated

|            |                         |            |            |            |            |                         |            |            |                        |            |            |
|------------|-------------------------|------------|------------|------------|------------|-------------------------|------------|------------|------------------------|------------|------------|
| 10         | 20                      | 30         | 40         | 50         | 60         | 70                      | 80         | 90         | 100                    | 110        | 120        |
| MKVLVATEKP | FAKIAVDGIK              | KEIEGAGFEL | ALLEKYTDKA | QLLDAVKDAN | AIIRSDIID  | AEVLDAAKEL              | KIVVRAGAGY | DNVDLNAATA | HGVCVMNTPG             | QNSNAVAELV | FGLLVYAVRN |
| 130        | 140                     | 150        | 160        | 170        | 180        | 190                     | 200        | 210        | 220                    | 230        | 240        |
| FYNGTSGTEL | MGK <del>KL</del> GIHAY | GNVGRNVARI | AKGFGMELYA | YDAFCPKDVI | EKDGVKAVDS | A <del>EELY</del> KTCNI | VSLHIPATAE | TKNSINHNLL | ANMPK <del>GAILV</del> | NTARKEVINE | DELIQIMEER |
| 250        | 260                     | 270        | 280        | 290        | 300        | 310                     |            |            |                        |            |            |
| PDFKYITDIM | PAANTKFAEL              | FAGRYFSTPK | KMGAQTAEAN | INAGIAAARQ | IVGFLKEGCE | KFRVNK                  |            |            |                        |            |            |



# Detailed Protein Report

| Cmpd. | No. of Cmpds. | m/z meas. | $\Delta$ m/z [ppm] | z | Rt [min] | Score | P | Range   | Sequence               | Modification       |
|-------|---------------|-----------|--------------------|---|----------|-------|---|---------|------------------------|--------------------|
| 30    | 1             | 642.8020  | -93.65             | 2 | 24.6     | 37.4  | 1 | 134-145 | K.KLGIHAYGNVGR.N       |                    |
| 53    | 1             | 562.7180  | -105.08            | 2 | 26.5     | 26.8  | 0 | 177-186 | K.AVDSAEELYK.T         |                    |
| 127   | 1             | 585.6140  | -47.30             | 3 | 33.3     | 20.3  | 0 | 187-202 | K.TCNIVSLHIPATAETK.N   | Carbamidomethyl: 2 |
| 45    | 1             | 457.7430  | -68.89             | 2 | 25.8     | 26.5  | 0 | 216-224 | K.GAILVNTAR.K          |                    |
| 248   | 1             | 783.3630  | 394.12             | 3 | 45.1     | 20.1  | 0 | 226-244 | K.EVINEDELIQLMEERPDK.Y |                    |
| 112   | 1             | 865.3940  | -48.69             | 2 | 31.9     | 32.1  | 0 | 272-289 | K.MGAQTAEANINAGIAAAR.Q |                    |

**Protein 3:** Glutaminase OS=Bacteroides fragilis (strain 638R) GN=glsA PE=3 SV=1

**Accession:** E1WKP3\_BACF6 **Score:** 173.58

**Database:** BacteroidesFragilis **MW [kDa]:** 34.30

**Seq. Coverage [%]:** 9.30 % **pl:** 5.93

**No. of Peptides:** 7

**Modification(s):** Deamidated

|            |            |            |            |            |            |            |            |            |            |             |            |
|------------|------------|------------|------------|------------|------------|------------|------------|------------|------------|-------------|------------|
| MDKKISISQI | KEVVQAYEQ  | VKGNTGGKNA | DYIPYLANID | KNLFGISVCL | LNGQTITVGD | FDYRFGIESV | SKVHTAILIL | RQYGAQKVLE | MIGADATGLP | FNSIITAILLE | NDHPSTPLVN |
| AGAISACSMV | TPIGNSDKKW | DAIVQNIIDL | CGSAPQLIEE | LYKSETATNF | NNSIAWLLK  | NYNRIYDDPN | MSLDLYTRQC | SLGVTAQMLS | VAAGTVANGG | VNPVTKKQVF  | DAELTPKITS |
| MIATVGFYEH | SGDWMYTSGI | PAKTGVGGGV | MGVLPGVFGV | SAFAPPLDGS | GNSVKAQLAI | KYIMNKLGLN | VFNGARVTIV | D          |            |             |            |

| Cmpd. | No. of Cmpds. | m/z meas. | $\Delta$ m/z [ppm] | z | Rt [min] | Score | P | Range   | Sequence       | Modification  |
|-------|---------------|-----------|--------------------|---|----------|-------|---|---------|----------------|---------------|
| 2     | 1             | 577.7450  | -21.23             | 2 | 20.9     | 23.1  | 0 | 164-173 | K.SETATNFNNR.S | Deamidated: 6 |
| 2     | 1             | 577.7450  | -21.23             | 2 | 20.9     | 23.4  | 0 | 164-173 | K.SETATNFNNR.S | Deamidated: 9 |
| 2     | 1             | 577.7450  | -21.23             | 2 | 20.9     | 37.6  | 0 | 164-173 | K.SETATNFNNR.S | Deamidated: 8 |
| 1     | 1             | 577.2350  | -52.42             | 2 | 20.3     | 51.4  | 0 | 164-173 | K.SETATNFNNR.S |               |
| 108   | 1             | 574.2530  | -87.62             | 2 | 31.5     | 23.1  | 0 | 228-237 | K.QVFDAELTPK.I |               |
| 161   | 1             | 531.2720  | -34.91             | 2 | 36.3     | 21.9  | 0 | 307-316 | K.LGLNVFNGAR.V | Deamidated: 4 |
| 161   | 1             | 531.2720  | -34.91             | 2 | 36.3     | 61.5  | 0 | 307-316 | K.LGLNVFNGAR.V | Deamidated: 7 |





# Detailed Protein Report

**Protein 4:** Putative purine nucleoside phosphorylase/uridine phosphorylase family protein OS=Bacteroides fragilis (strain 638R)  
GN=BF638R\_1189 PE=4 SV=1

**Accession:** E1WQX2\_BACF6 **Score:** 80.95

**Database:** BacteroidesFragilis **MW [kDa]:** 32.30

**Seq. Coverage [%]:** 7.50 % **pI:** 5.72

**No. of Peptides:** 1

|             |             |             |             |            |            |              |            |            |            |            |            |
|-------------|-------------|-------------|-------------|------------|------------|--------------|------------|------------|------------|------------|------------|
| 10          | 20          | 30          | 40          | 50         | 60         | 70           | 80         | 90         | 100        | 110        | 120        |
| MKKYFPSSSEL | IINEDGSVFH  | LHVKPEWLAD  | KVILVGD PGR | VALVASHFEN | KECEVESREF | KTVTPTGYK GK | RITVVSTGIG | CDNIDIVVNE | LDALANIDFQ | TREEKEHLRS | LELVRIGTCG |
| 130         | 140         | 150         | 160         | 170        | 180        | 190          | 200        | 210        | 220        | 230        | 240        |
| GLQPNTPVGT  | FVCSEK SIGF | DGLLN FYAGR | NAVCDL PFER | AFLNHMGWSG | NMCAPAPYVI | DANAELIDRI   | AQEDMVRGVT | IAAGGFFGPQ | GRELRVPLAD | PKQNDKIEKF | EYKGYKITNF |
| 250         | 260         | 270         | 280         | 290        | 300        |              |            |            |            |            |            |
| EMESSALAGL  | SKLMGHKAMT  | VCMVIANRLI  | KEANTGYKNT  | IDTLIKTVLD | RI         |              |            |            |            |            |            |

| Cmpd. | No. of Cmpds. | m/z meas. | $\Delta$ m/z [ppm] | z | Rt [min] | Score | P | Range   | Sequence     | Modification |
|-------|---------------|-----------|--------------------|---|----------|-------|---|---------|--------------|--------------|
| 18    | 1             | 481.2260  | -33.68             | 2 | 23.2     | 61.0  | 0 | 190-197 | R.IAQEDMVR.G |              |
